# Supplementary material
Source: PubMed Central journal article supplement (PMC4020105)
Supplement: 1401797111_pnas.201401797SI.pdf [file 1401797111_pnas.201401797SI.pdf]

# Supporting Information

Chen et al. 10.1073/pnas.1401797111

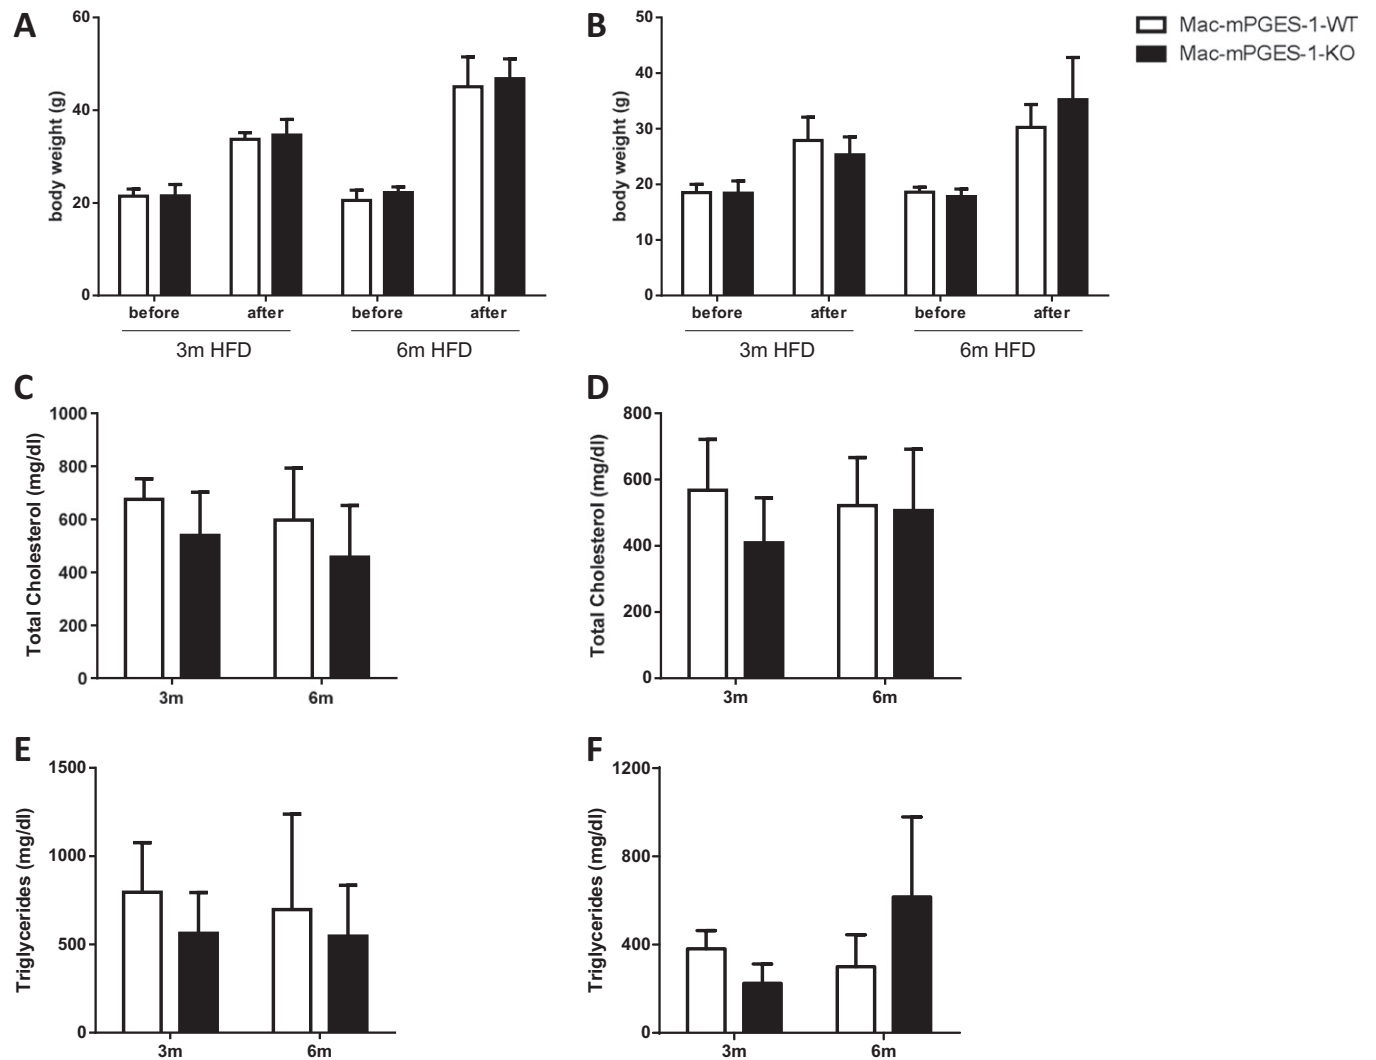

**Fig. S1.** Effects of myeloid cell microsomal prostaglandin E synthase 1 (mPGES-1) deletion on body weight and plasma lipid profile in hyperlipidemic mice. Body weight, plasma total cholesterol, and triglycerides were measured in Mac-mPGES-1-WT and Mac-mPGES-1-KO mice before and after 3 mo or 6 mo high-fat diet (HFD) feeding. No difference was detected between genotypes for either male or female mice. (A) Body weight, males; (B) body weight, females; (C) plasma total cholesterol, males; (D) plasma total cholesterol, females; (E) plasma triglycerides, males; (F) plasma triglycerides, females ( $n = 8-11$  for body weight and  $n = 6-8$  for plasma total cholesterol and triglycerides).

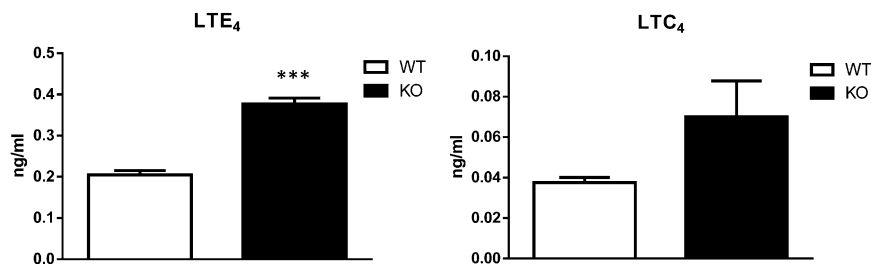

**Fig. S2.** Leukotriene profile in peritoneal macrophages. Peritoneal macrophages from LysMCre (WT) or LysMCre, mPGES-1<sup>fl/fl</sup> (KO) mice were cultured and stimulated with lipopolysaccharide (LPS) (5  $\mu$ g/mL) for 24 h. Leukotriene (LT)<sub>E<sub>4</sub></sub> and LTC<sub>4</sub> were quantified by mass spectrometry in the culture medium; LTB<sub>4</sub> and LTD<sub>4</sub> were under the determination limit ( $n = 4$ ; \*\*\* $P < 0.001$ ).

## A Neutrophils

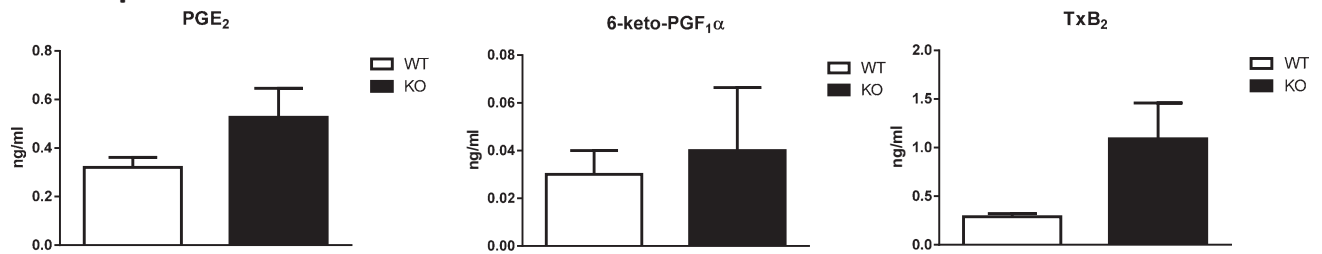

## B Dendritic cells

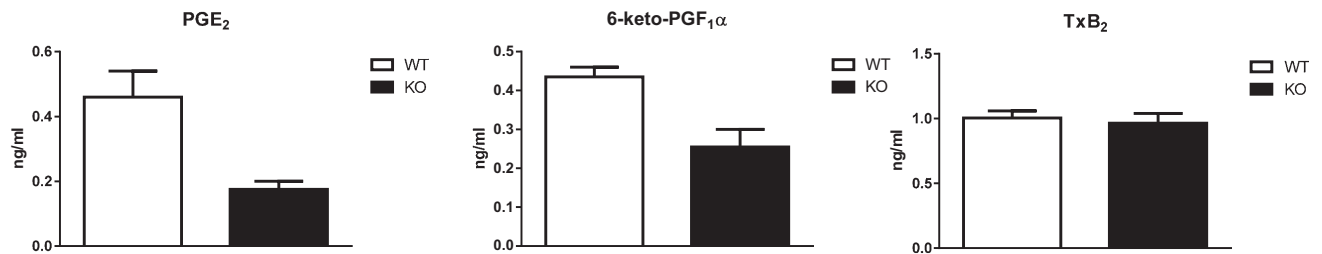

**Fig. 53.** (A and B) Prostanoid and leukotriene profiles in peritoneal neutrophils (A) and dendritic cells (B). Peritoneal neutrophils and splenic dendritic cells from LysMCre (WT) or LysMCre, mPGES-1<sup>fl/fl</sup> (KO) mice were cultured and stimulated with LPS (5 μg/mL) for 24 h and prostaglandin (PGE<sub>2</sub>), 6-keto-PGF<sub>1α</sub>, and thromboxane (Tx)B<sub>2</sub> were quantified by mass spectrometry in the culture medium. Leukotrienes were under the determination limit ( $n = 3$  for neutrophils and  $n = 2$  for dendritic cells).

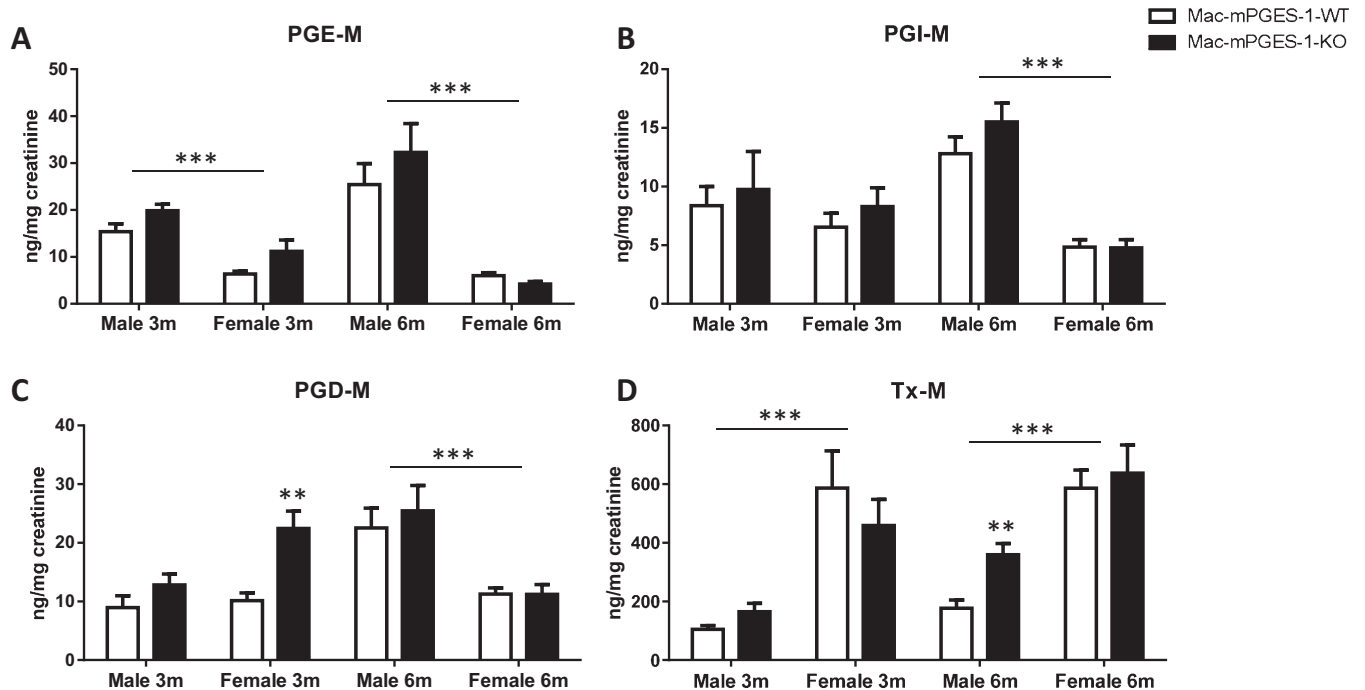

**Fig. 54.** Effects of myeloid cell mPGES-1 deletion on urinary prostanoid metabolites in hyperlipidemic mice. (A–D) PGE-M (A), PGI-M (B), PGD-M (C), and Tx-M (D) were examined in Mac-mPGES-1-WT and Mac-mPGES-1-KO mice after 3 mo or 6 mo HFD feeding. No difference was detected between genotypes for either male or female mice ( $n = 4–15$ , \*\* $P < 0.01$ , \*\*\* $P < 0.001$ ).



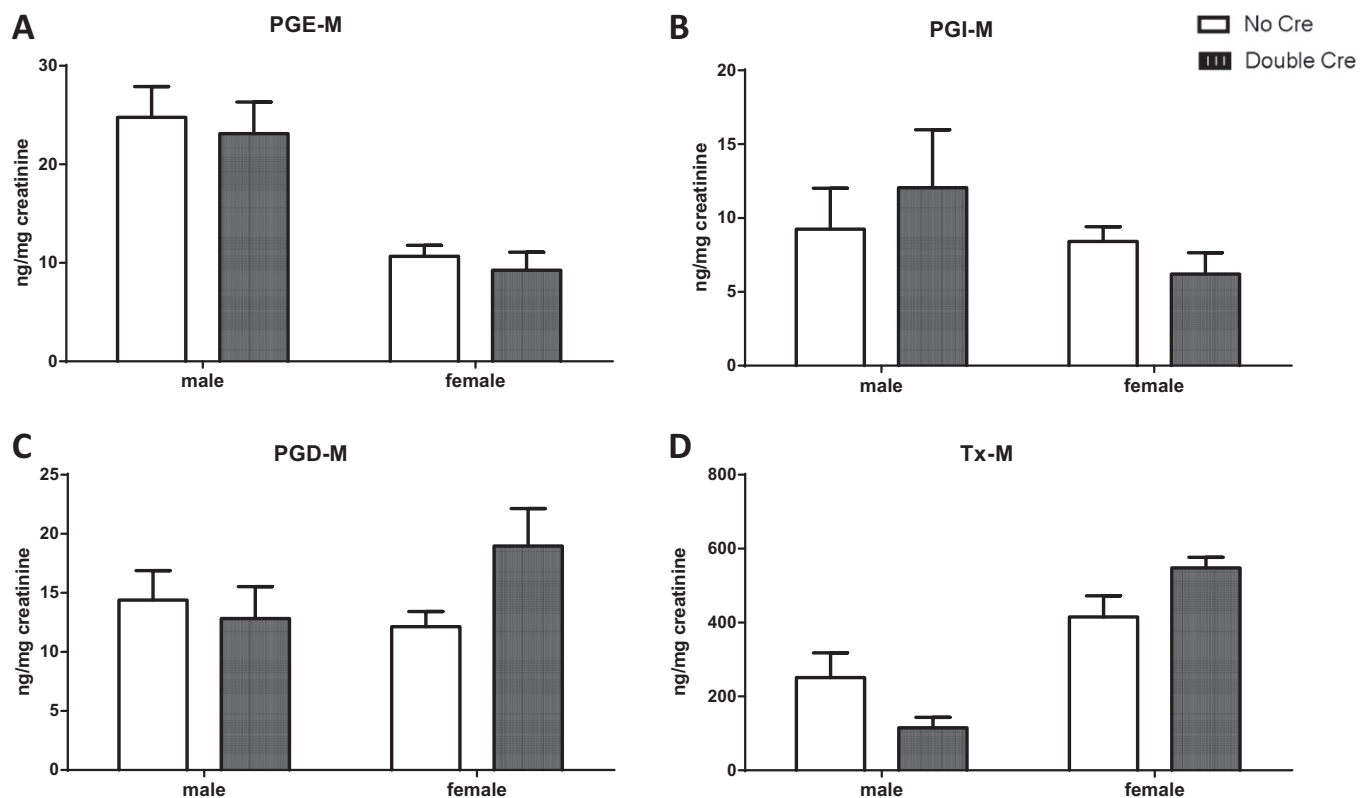

**Fig. S6.** Effects of vascular cell mPGES-1 deletion on urinary production of prostanoids metabolites in hyperlipidemic mice. (A–D) PGE-M (A), PGI-M (B), PGD-M (C), and Tx-M (D) were examined in vascular cell mPGES-1-deficient mice after 3 mo HFD feeding. No difference was detected between genotypes for either male or female mice ( $n = 4-8$ ).

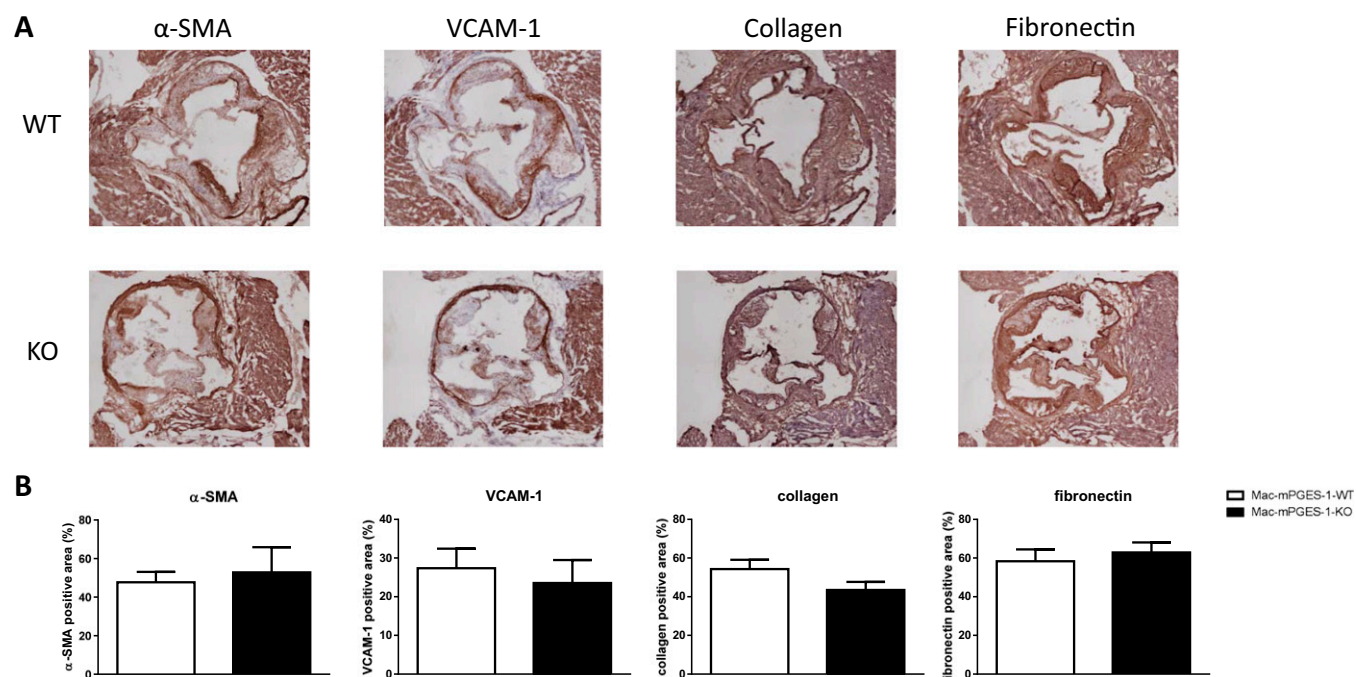

**Fig. S7.** Lesion morphology analysis in aortic roots of Mac-mPGES-1-WT and Mac-mPGES-1-KO mice on a HFD for 3 mo. (A) Representative images for  $\alpha$ -SMA, VCAM-1, collagen, and fibronectin staining. (B) Quantification of immunohistochemistry staining of  $\alpha$ -SMA, VCAM-1, collagen, and fibronectin ( $n = 4-5$ ).
